# Supplementary material
Source: MDPI journal article supplement (https://www.mdpi.com/2311-5637/8/11/619)
Supplement: s1 [file s1]

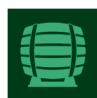**Table S1.** Chemical composition and physicochemical properties of camel milk and SKD (mean  $\pm$  SE),  $n = 6$ .

| Constituents *                                      |    | Camel Milk        | Sukkari Date       |
|-----------------------------------------------------|----|-------------------|--------------------|
| Moisture [g 100 g <sup>-1</sup> ]                   |    | 90.16 $\pm$ 0.23  | 11.1 $\pm$ 0.21    |
| Protein [g 100 g <sup>-1</sup> ]                    |    | 2.71 $\pm$ 0.10   | 2.55 $\pm$ 0.04    |
| Fat [g 100 g <sup>-1</sup> ]                        |    | 2.80 $\pm$ 0.12   | 3.15 $\pm$ 0.09    |
| Ash [g 100 g <sup>-1</sup> ]                        |    | 0.63 $\pm$ 0.06   | 2.61 $\pm$ 0.08    |
| Available carbohydrates ** [g 100 g <sup>-1</sup> ] |    | 3.70 $\pm$ 0.58   | 76.25 $\pm$ 1.25   |
| Fiber [g 100 g <sup>-1</sup> ]                      |    | ND                | 4.35 $\pm$ 0.31    |
| Minerals [mg 100 g <sup>-1</sup> ]:                 | Na | 52.40 $\pm$ 4.11  | 37.84 $\pm$ 5.63   |
|                                                     | Ca | 104.81 $\pm$ 8.22 | 108.23 $\pm$ 8.70  |
|                                                     | K  | 112.53 $\pm$ 4.41 | 651.25 $\pm$ 29.33 |
|                                                     | P  | 61.20 $\pm$ 4.80  | 47.95 $\pm$ 2.56   |
|                                                     | Mg | 9.05 $\pm$ 0.71   | 86.35 $\pm$ 6.88   |
|                                                     | Zn | 0.53 $\pm$ 0.04   | 9.37 $\pm$ 0.99    |
|                                                     | Fe | 0.61 $\pm$ 0.05   | 4.46 $\pm$ 0.30    |
|                                                     | Cu | 0.19 $\pm$ 0.02   | 2.28 $\pm$ 0.34    |
| pH                                                  |    | 6.69 $\pm$ 0.05   | 6.52 $\pm$ 0.07    |
| Titratable acidity                                  |    | 0.16 $\pm$ 0.01   | 0.45 $\pm$ 0.01    |
| TPC [mg GAE g <sup>-1</sup> ]                       |    | ND                | 54.12 $\pm$ 1.90   |
| TF [mg QE g <sup>-1</sup> ]                         |    | ND                | 56.79 $\pm$ 3.15   |
| TFL [mg QE g <sup>-1</sup> ]                        |    | ND                | 34.58 $\pm$ 2.43   |
| DPPH-RSA [ $\mu$ mol of TE g <sup>-1</sup> ]        |    | 5.87 $\pm$ 0.12   | 87.15 $\pm$ 5.64   |
| ABTS-RSA [ $\mu$ mol of TE g <sup>-1</sup> ]        |    | 9.24 $\pm$ 0.34   | 96.18 $\pm$ 4.98   |

\*: data were calculated on wet-base, \*\*: determined as lactose in camel milk and available carbohydrates in SKD by difference. ND: not determined, DPPH-RSA: DPPH radical scavenging activity, ABTS-RSA: ABTS radical scavenging activity.

**Table S2.** Chemical composition and physicochemical properties of fermented camel milk fortified with 10% Sukkari date (SKD), (mean  $\pm$  SE),  $n = 6$ .

| Physiochemical Parameters                          | FCM+10% SKD      |
|----------------------------------------------------|------------------|
| Moisture [g 100 g <sup>-1</sup> ]                  | 84.09 $\pm$ 0.09 |
| Protein [g 100 g <sup>-1</sup> ]                   | 2.76 $\pm$ 0.02  |
| Fat [g 100 g <sup>-1</sup> ]                       | 2.77 $\pm$ 0.02  |
| Ash [g 100 g <sup>-1</sup> ]                       | 0.78 $\pm$ 0.02  |
| Solid not-fat [g 100 g <sup>-1</sup> ]             | 13.24 $\pm$ 0.15 |
| Available carbohydrates # [g 100 g <sup>-1</sup> ] | 9.69 $\pm$ 0.18  |
| Fiber [g 100 g <sup>-1</sup> ]                     | 0.41 $\pm$ 0.03  |
| pH                                                 | 4.53 $\pm$ 0.03  |
| Titratable acidity **                              | 0.89 $\pm$ 0.01  |
| WHC %                                              | 84.52 $\pm$ 0.46 |

\*: data were calculated on wet-base, -: not determined, #: determined as lactose in camel milk and available carbohydrates in SKD drinks by difference, \*\*: titratable acidity calculated as lactic acid,

**Table S3.** Mineral contents (mg 100 g<sup>-1</sup>) of fermented camel milk fortified with 10% Sukkari date (SKD), (mean ± SE), *n* = 6.

| Minerals [mg 100 g <sup>-1</sup> ] | FCM+10% SKD   |
|------------------------------------|---------------|
| Macroelements                      |               |
| Na                                 | 46.69 ± 2.32  |
| Ca                                 | 103.30 ± 2.11 |
| K                                  | 153.46 ± 3.97 |
| P                                  | 54.88 ± 1.42  |
| Mg                                 | 15.51 ± 0.81  |
| Microelements                      |               |
| Zn                                 | 1.31 ± 0.17   |
| Fe                                 | 0.92 ± 0.12   |
| Cu                                 | 0.37 ± 0.07   |

\*: The data were manipulated on a wet weight basis,

**Table S4.** Total phenolic, total flavonoids, total flavonols contents, and relative antioxidant capacity of fermented camel milk fortified with 10% Sukkari date (SKD), (mean ± SE), *n* = 6.

| Items                                  | FCM+10%SKD   |
|----------------------------------------|--------------|
| TPC [mg GAE g <sup>-1</sup> ]          | 5.23 ± 0.66  |
| TF [mg QE g <sup>-1</sup> ]            | 5.90 ± 0.29  |
| TFL [mg QE g <sup>-1</sup> ]           | 3.27 ± 0.41  |
| DPPH-RSA [μmol of TE g <sup>-1</sup> ] | 12.72 ± 1.61 |
| ABTS-RSA [μmol of TE g <sup>-1</sup> ] | 16.43 ± 0.98 |

\*: The data were manipulated on a wet weight basis, DPPH-RSA: DPPH radical scavenging activity, ABTS-RSA: ABTS radical scavenging activity.

**Table S5.** Microbiological analysis of fermented camel milk fortified with 10% Sukkari date (SKD) palm (mean ± SE), *n* = 6.

| Bacterial Strain                                                   | FCM+10% SKD |
|--------------------------------------------------------------------|-------------|
| <i>Str. thermophilus</i> [Log <sub>10</sub> cfu mL <sup>-1</sup> ] | 8.71 ± 0.08 |
| <i>L. acidophilus</i> [Log <sub>10</sub> cfu mL <sup>-1</sup> ]    | 8.85 ± 0.05 |
| <i>B. bifidum</i> [Log <sub>10</sub> cfu mL <sup>-1</sup> ]        | 7.55 ± 0.05 |
